# Supplementary material
Source: PubMed Central journal article supplement (PMC3947321)

# Supplementary Figure 1

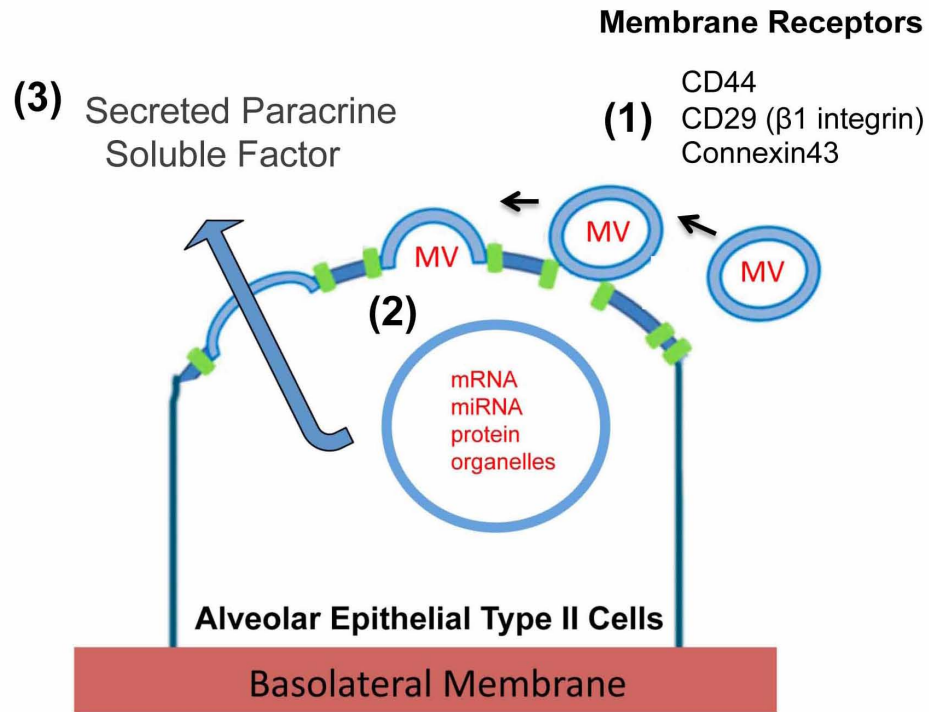

## Protocol:

C57BL6 Mice (10-12 weeks old ~ 25 gm)

48 h

IT Endotoxin 100  $\mu$ g  
+ IT MV (MSC, NHLF) or  
+ IT MSC or  
+ IV MV (MSC)

BAL protein, neutrophil & MIP-2 Levels  
Histology  
EVLW

# Supplementary Figure 2

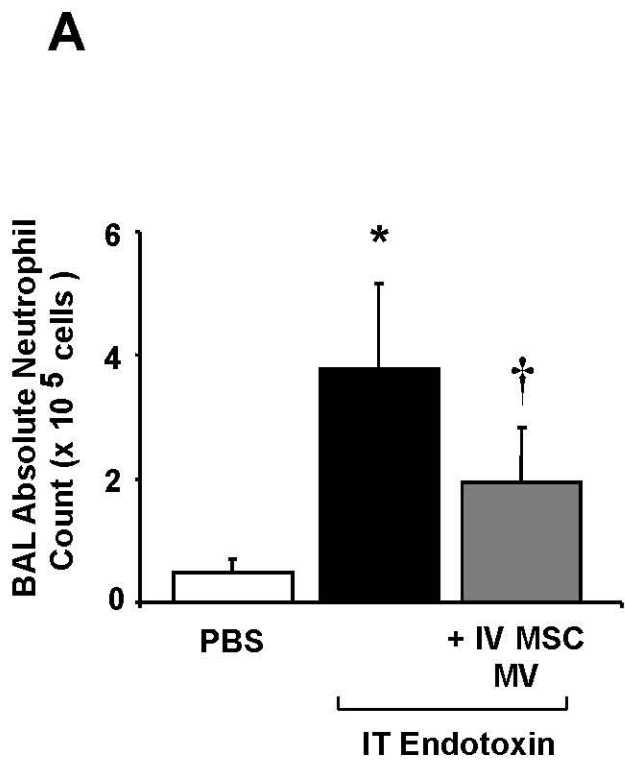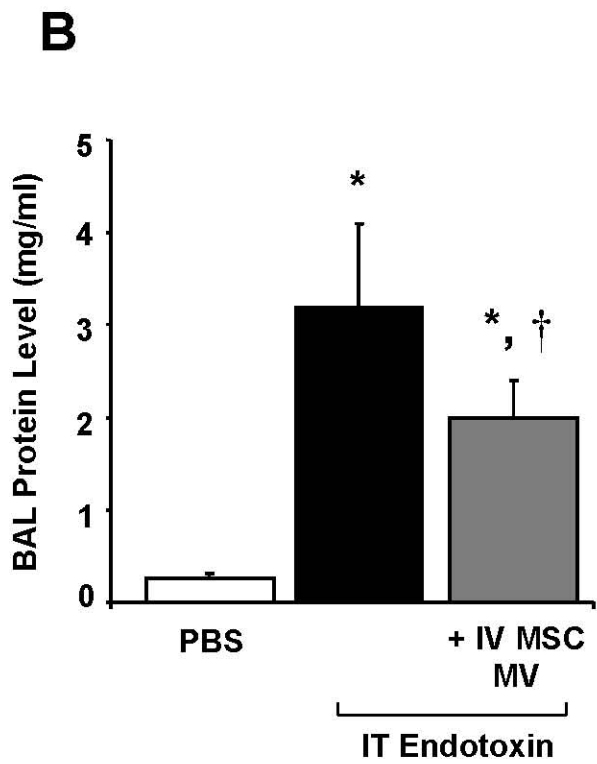

# Supplementary Figure 3

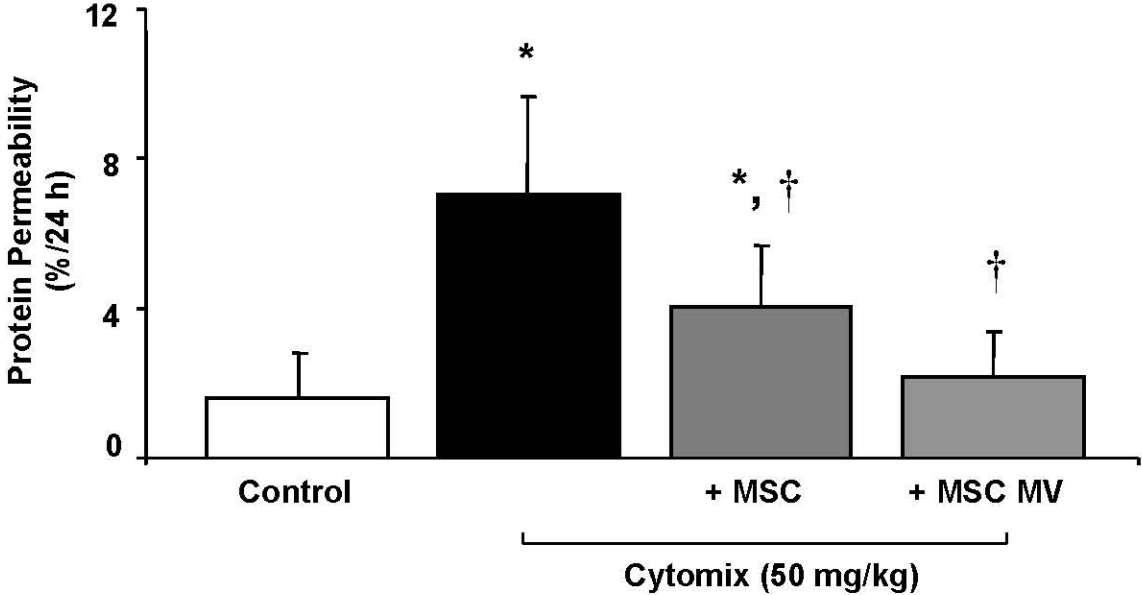

# Supplementary Figure 4

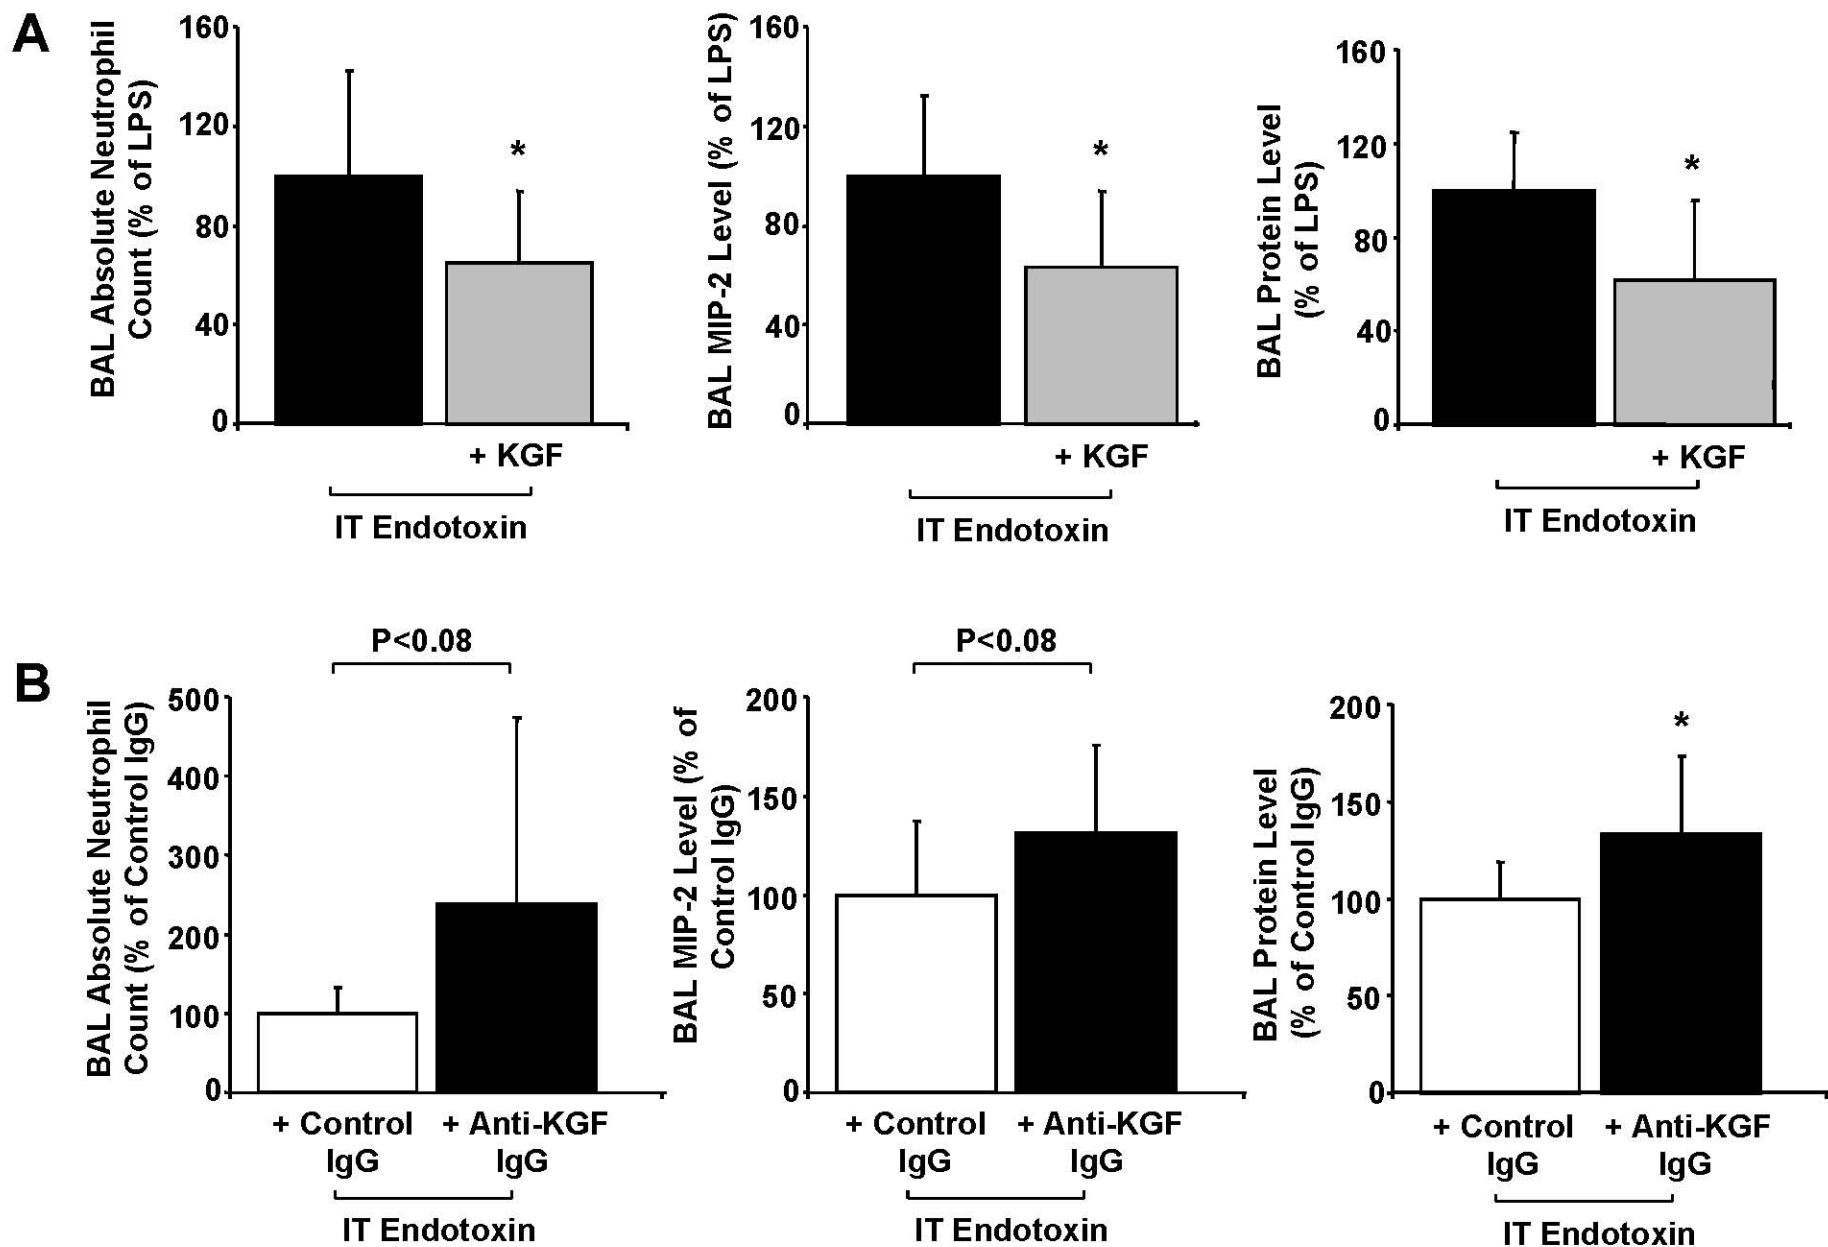

# Supplementary Figure 5

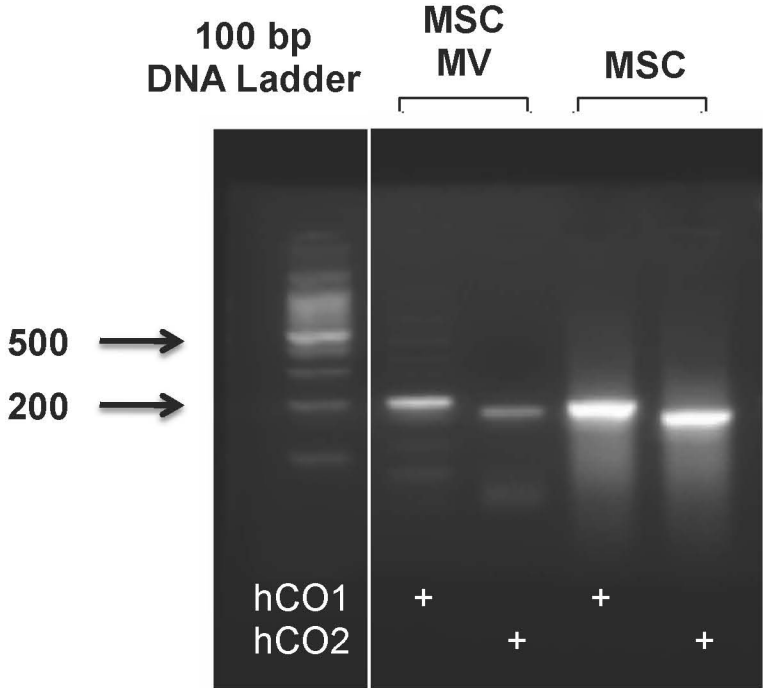

Supplement: NIHMS517535-supplement-Supp_Figure_S1-S5.pdf [file NIHMS517535-supplement-Supp_Figure_S1-S5.pdf]
